# Supplementary material for: Challenges experienced with early introduction and sustained consumption of allergenic foods in the Enquiring About Tolerance (EAT) study: A qualitative analysis
Source: PubMed Central journal article supplement (PMC6904907; doi:10.1016/j.jaci.2019.09.004), 2019-12

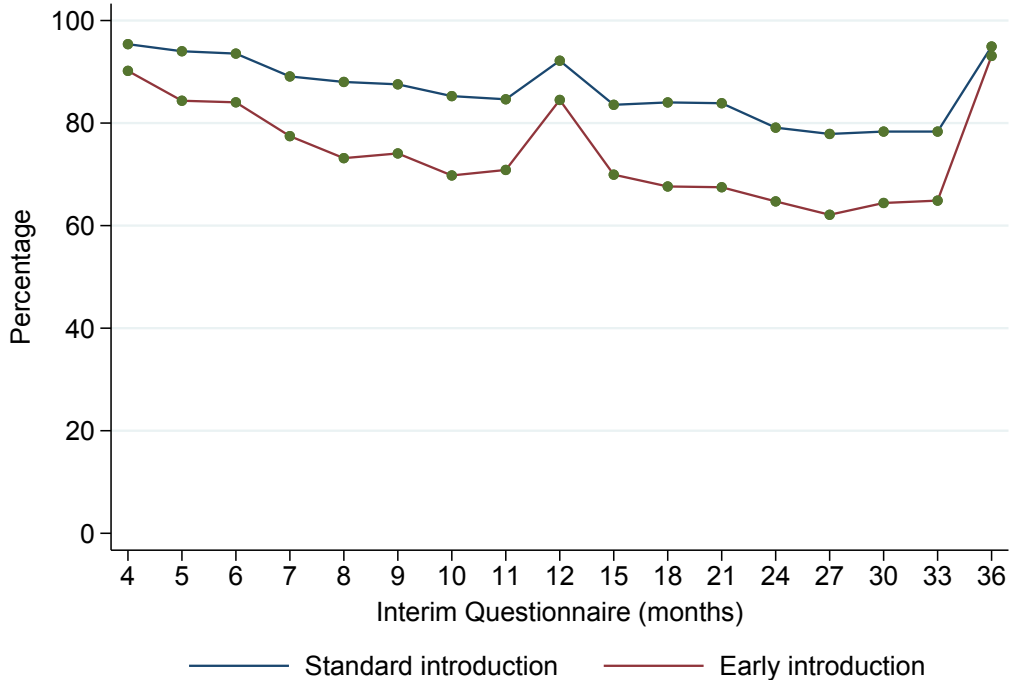

Supplement: mmc2.pdf [file mmc2.pdf]
