# Supplementary material for: Challenges experienced with early introduction and sustained consumption of allergenic foods in the Enquiring About Tolerance (EAT) study: A qualitative analysis
Source: PubMed Central journal article supplement (PMC6904907; doi:10.1016/j.jaci.2019.09.004), 2019-12
Supplement: mmc3.pdf [file mmc3.pdf]

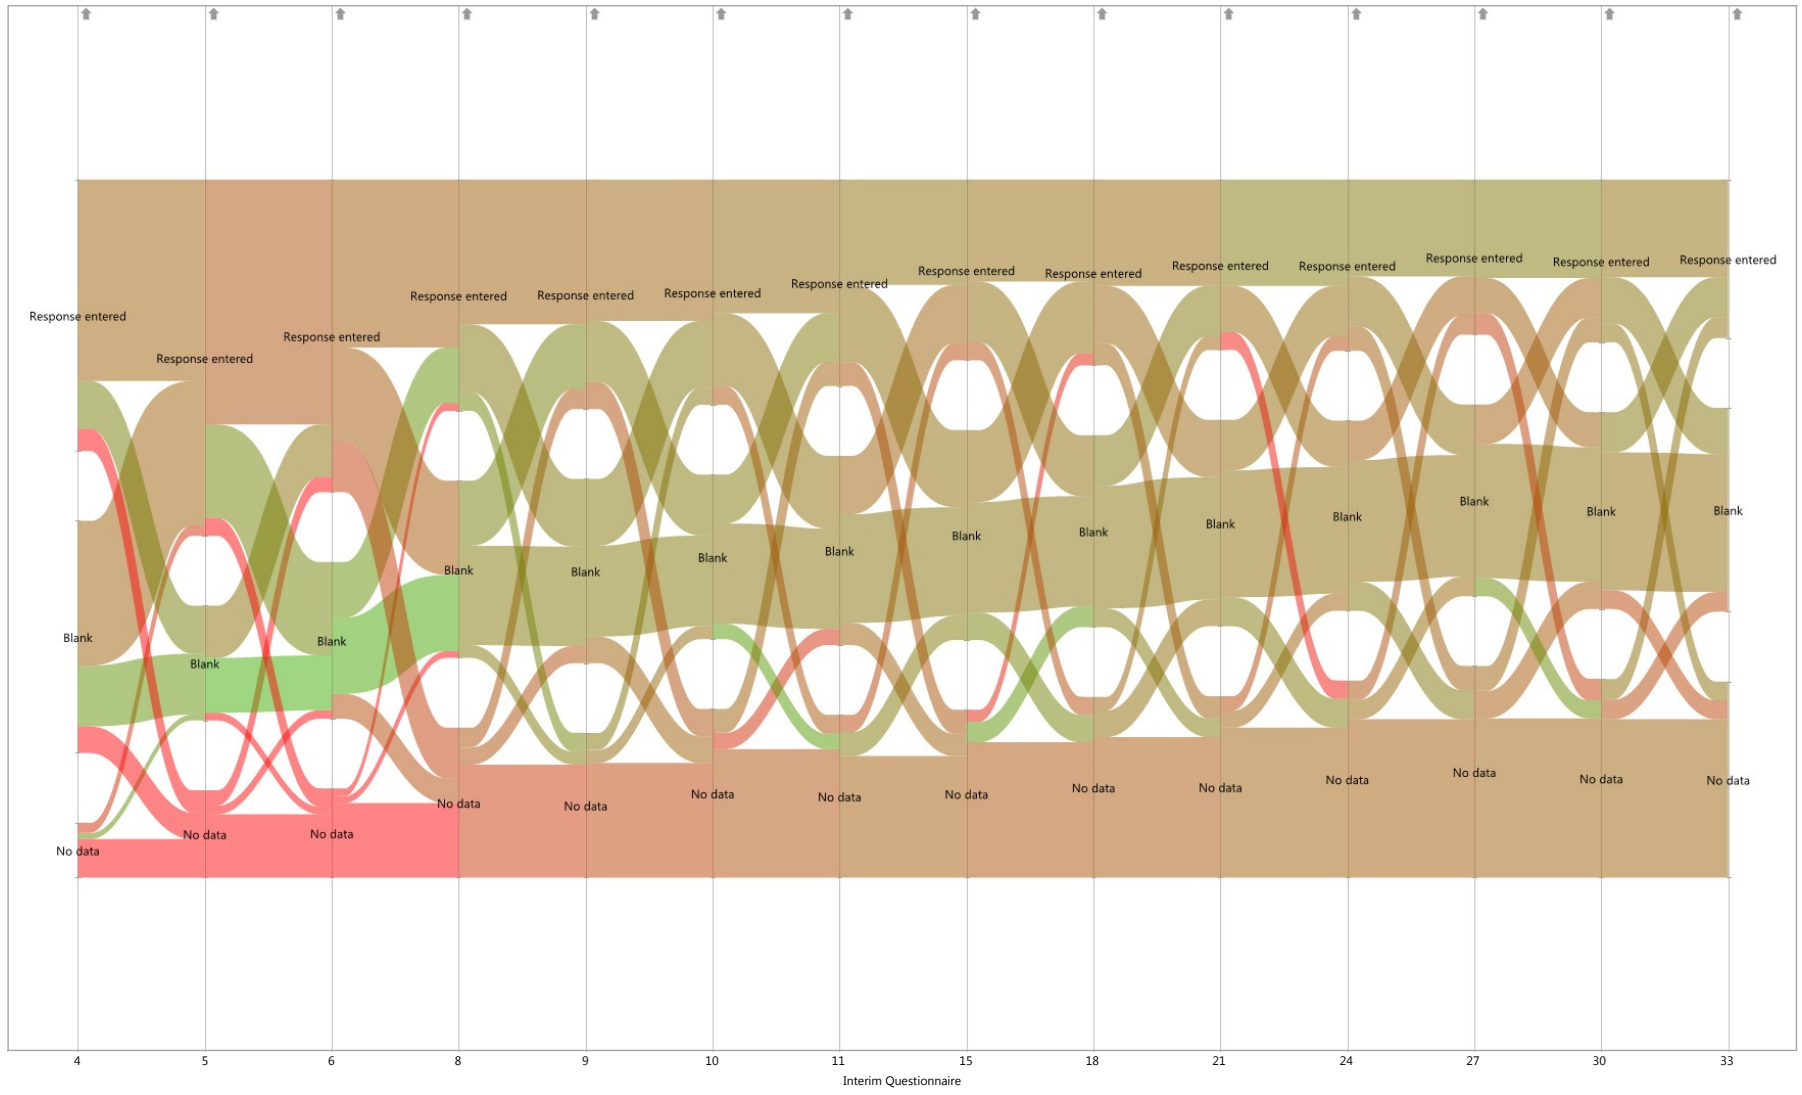

Per-Protocol Adherence  
Yes  
No
